# Supplementary material for: Short-term treatment effects produced by rapid maxillary expansion evaluated with computed tomography: A systematic review with meta-analysis
Source: PubMed Central journal article supplement — Korean J Orthod. 2020 Sep 25;50(5):314–23. doi: 10.4041/kjod.2020.50.5.314 (PMC7500570; doi:10.4041/kjod.2020.50.5.314), 2020-09-25
Supplement: KJOD-50-314_Supple.pdf [file KJOD-50-314_Supple.pdf]

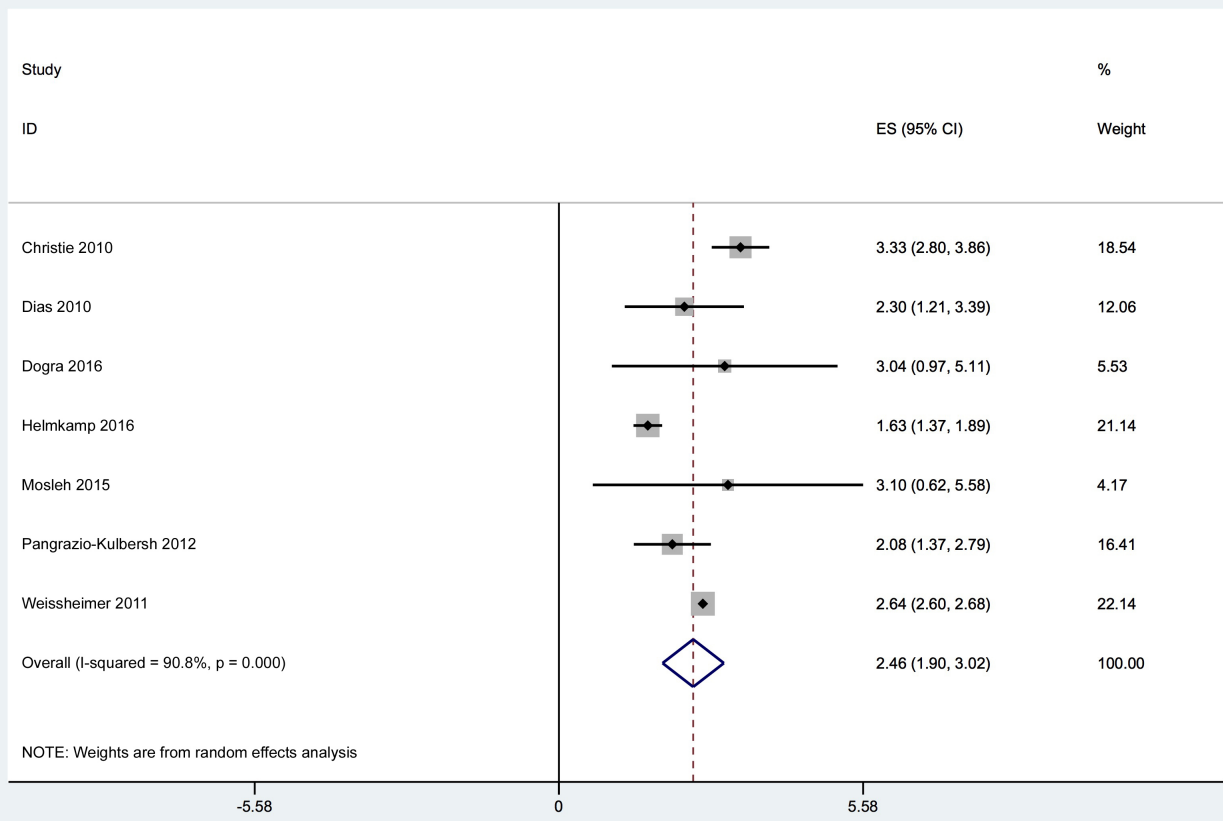

**Supplementary Figure 1.** Forest plot of the maxillary basal bone width increments in the interval between  $T_0$  (pre-expansion) and  $T_1$  (post-expansion). Reported data are expressed in millimeters (mm).

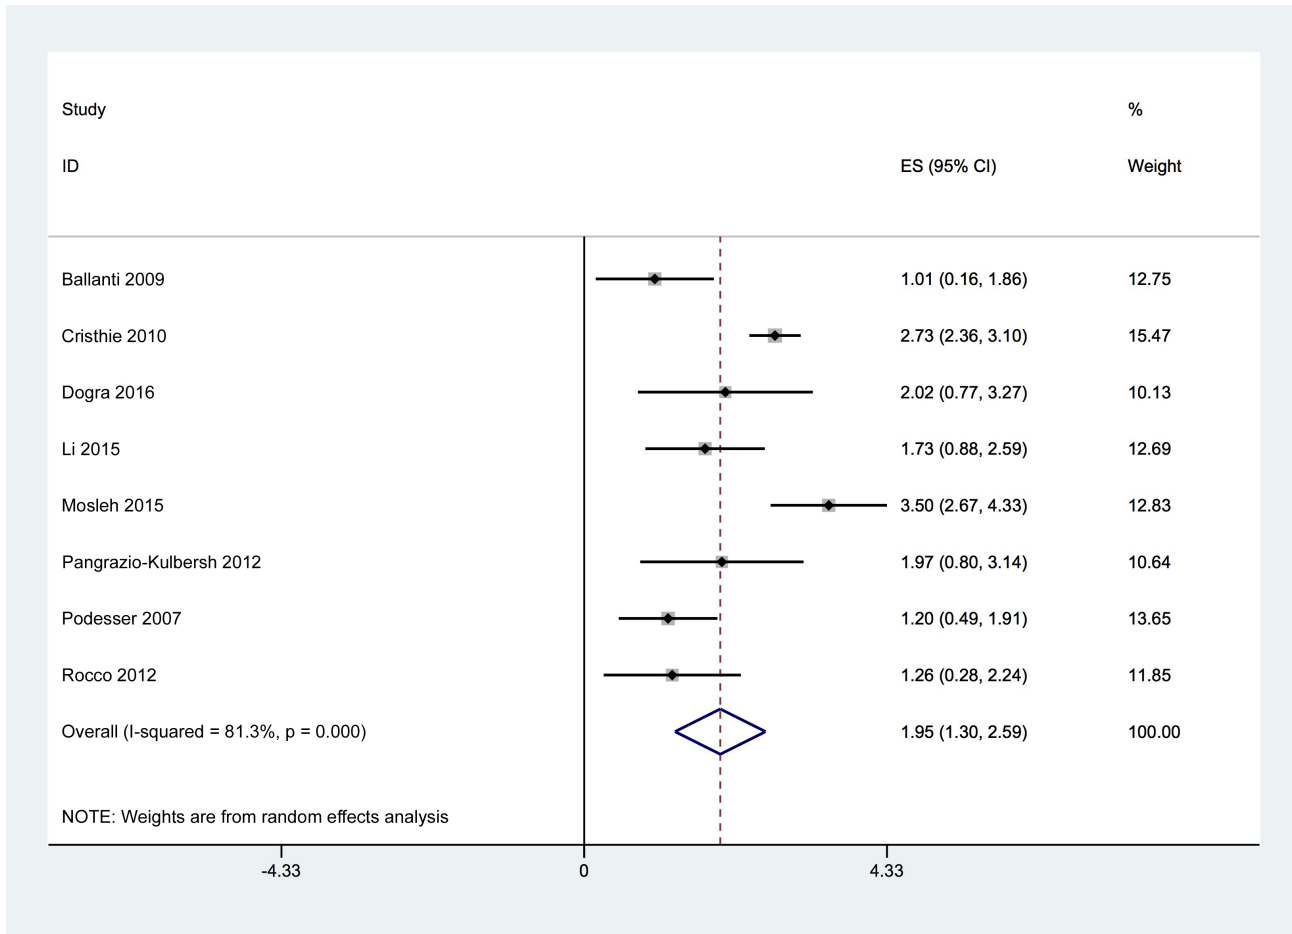

**Supplementary Figure 2.** Forest plot of the nasal cavity width increments in the interval between T<sub>0</sub> (pre-expansion) and T<sub>1</sub> (post-expansion). Reported data are expressed in millimeters (mm).

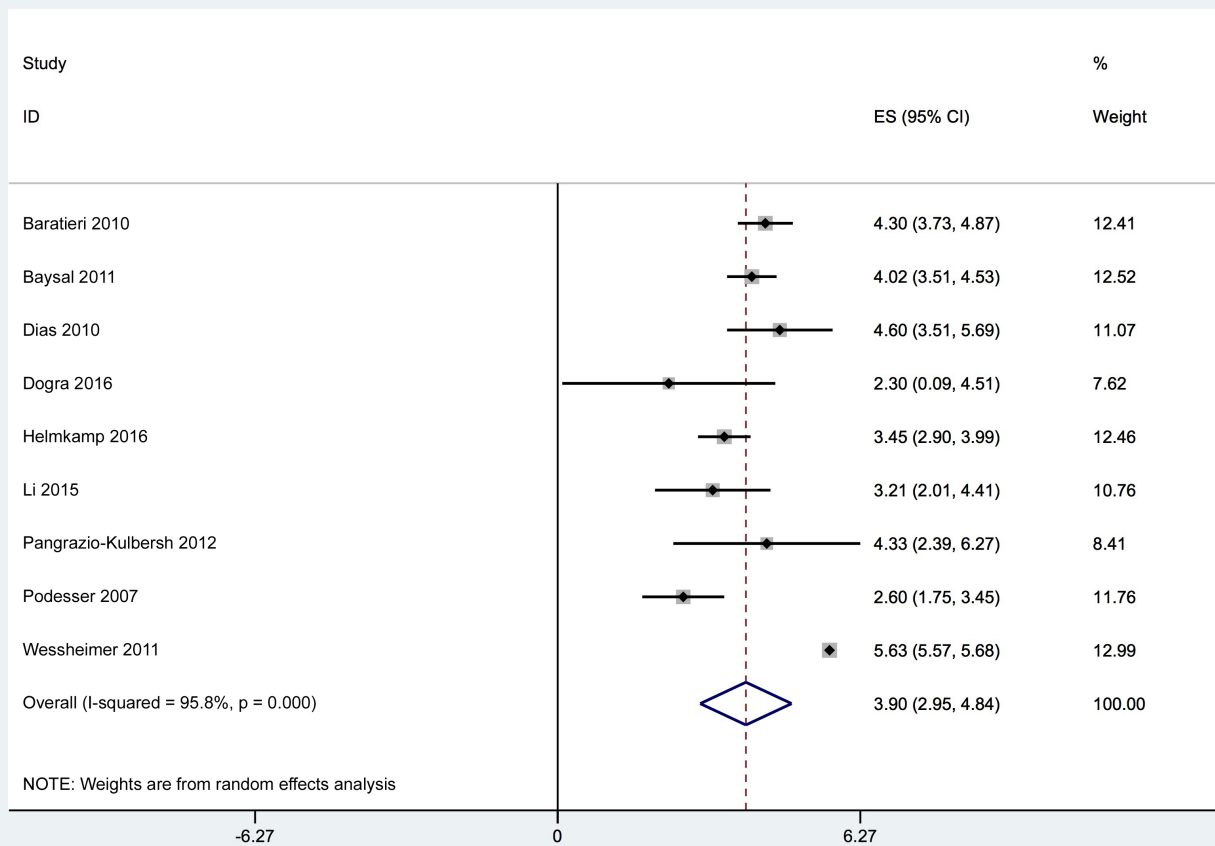

**Supplementary Figure 3.** Forest plot of increments in the quantitative data synthesis outcome alveolar buccal crest width in the interval between  $T_0$  (pre-expansion) and  $T_1$  (post-expansion). Reported data are expressed in millimeters (mm).

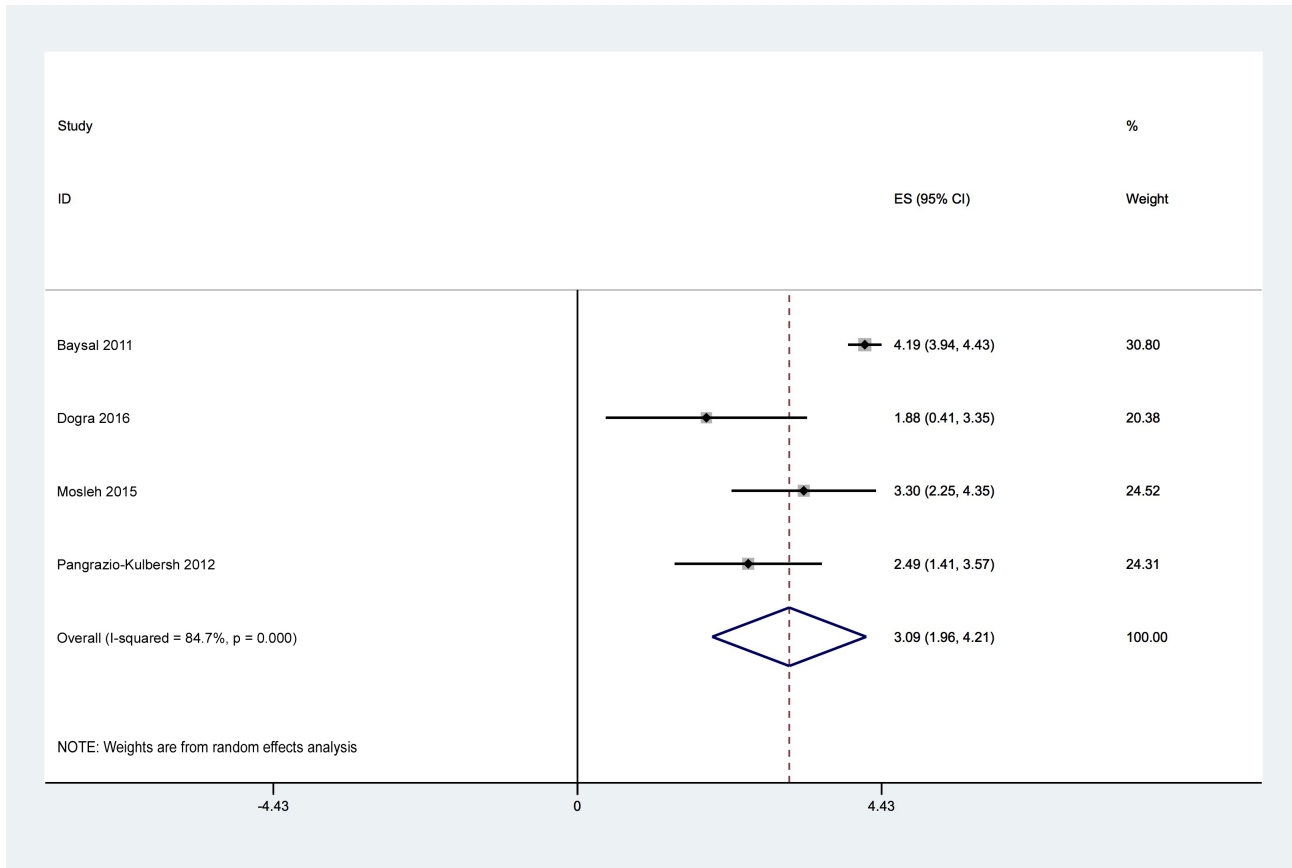

**Supplementary Figure 4.** Forest plot of increments in the quantitative data synthesis outcome alveolar palatal crest width in the interval between T<sub>0</sub> (pre-expansion) and T<sub>1</sub> (post-expansion). Reported data are expressed in millimeters (mm).

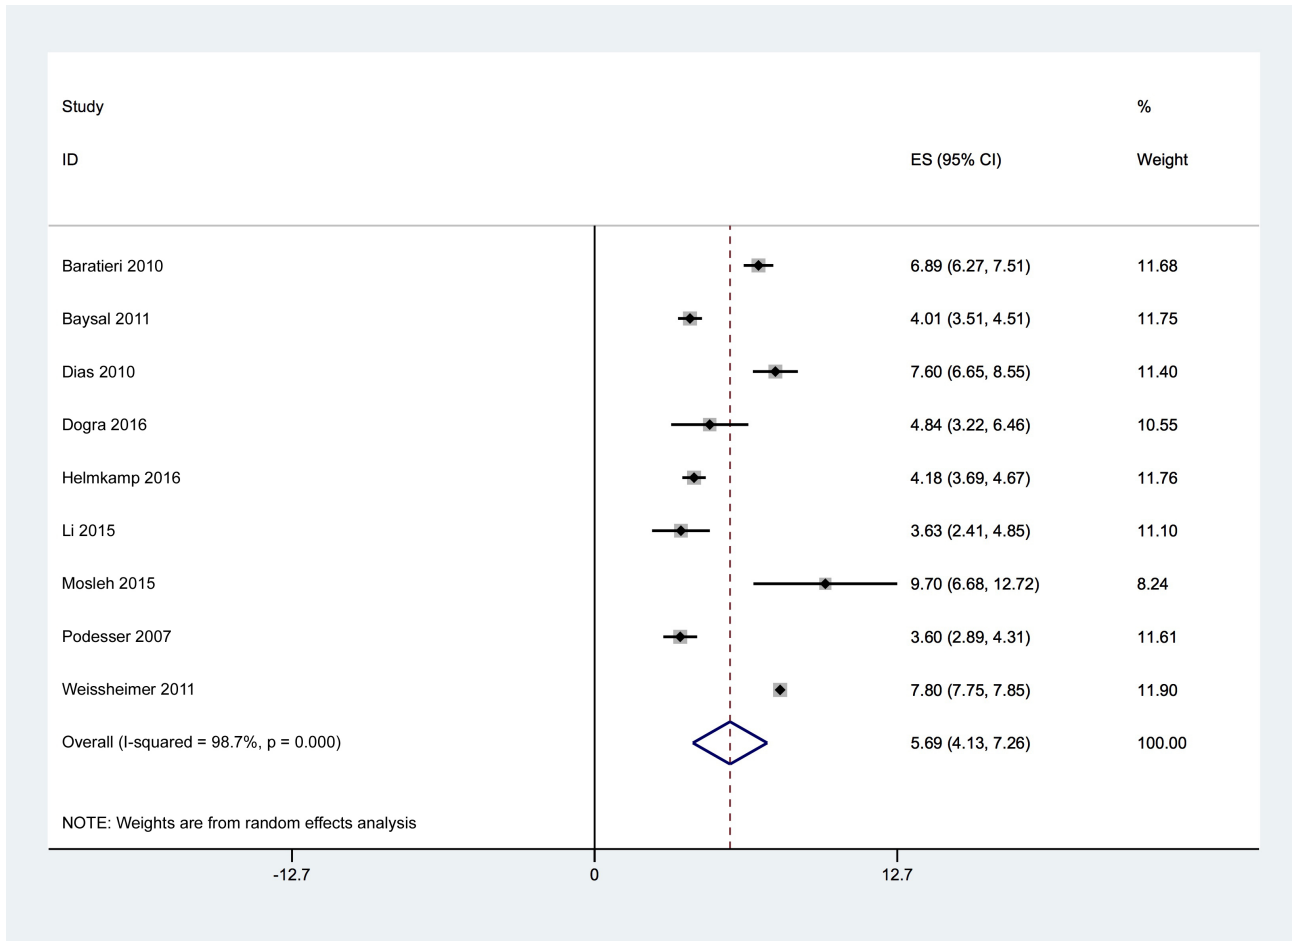

**Supplementary Figure 5.** Forest plot of increments in the quantitative data synthesis outcome inter-molar crown width in the time interval between  $T_0$  (pre-expansion) and  $T_1$  (post-expansion). Reported data are expressed in millimeters (mm).

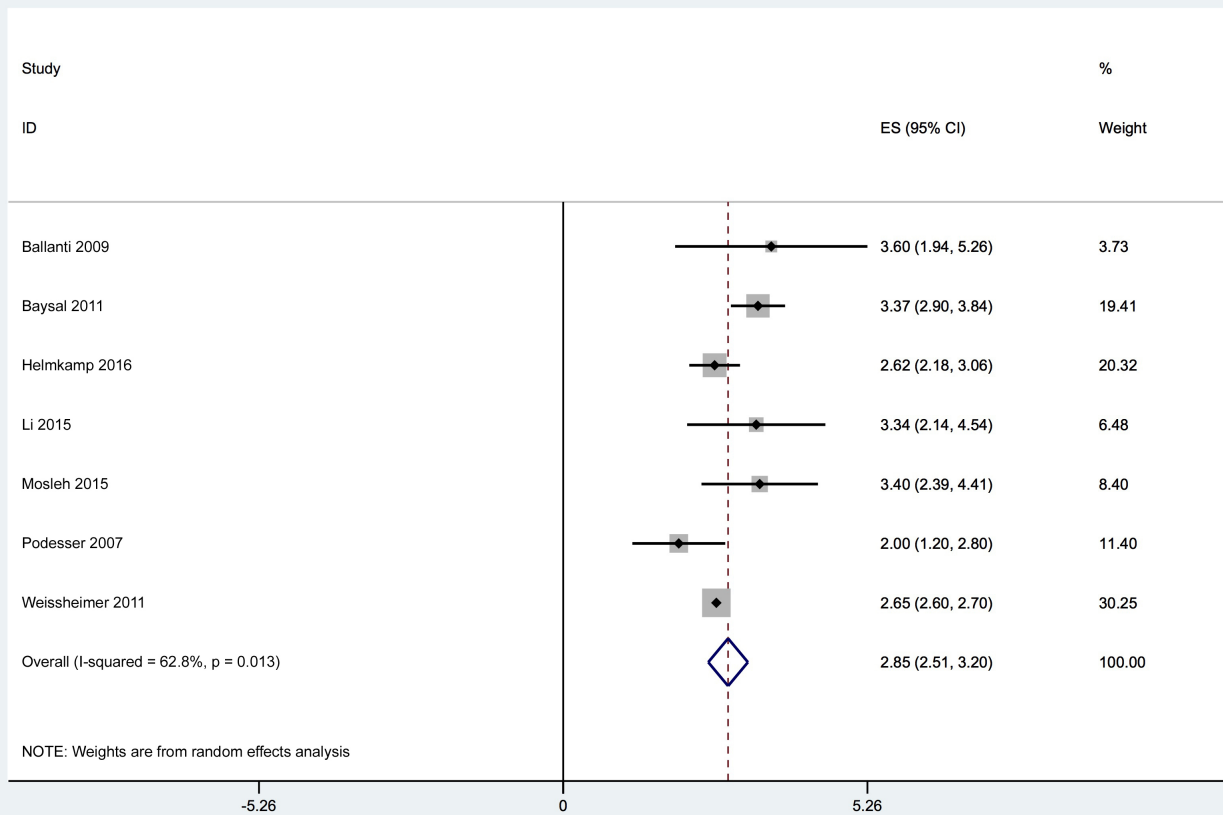

**Supplementary Figure 6.** Forest plot of increments in the quantitative data synthesis outcome inter-molar root apex width in the interval between  $T_0$  (pre-expansion) and  $T_1$  (post-expansion). Reported data are expressed in millimeters (mm).

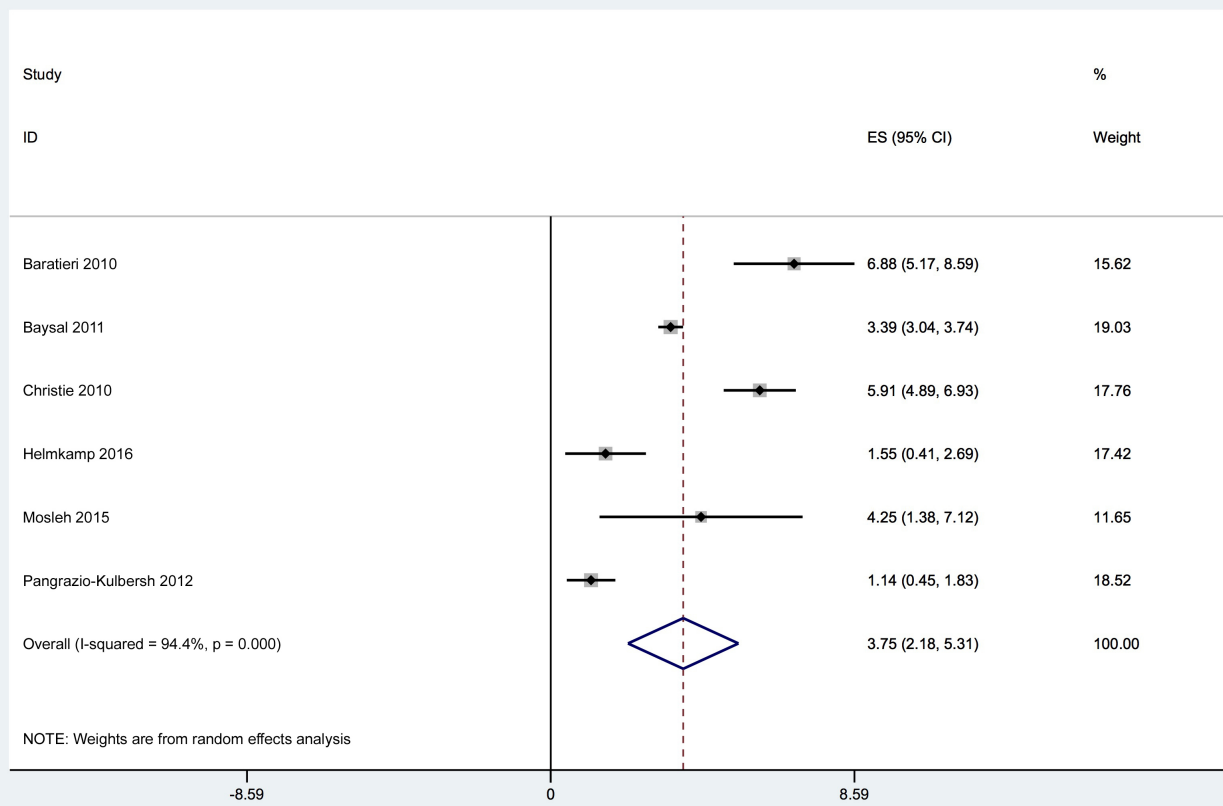

**Supplementary Figure 7.** Forest plot of increments in the quantitative data synthesis outcome dental tipping in the interval between  $T_0$  (pre-expansion) and  $T_1$  (post-expansion). Reported data are expressed in angular degree ( $^{\circ}$ ).

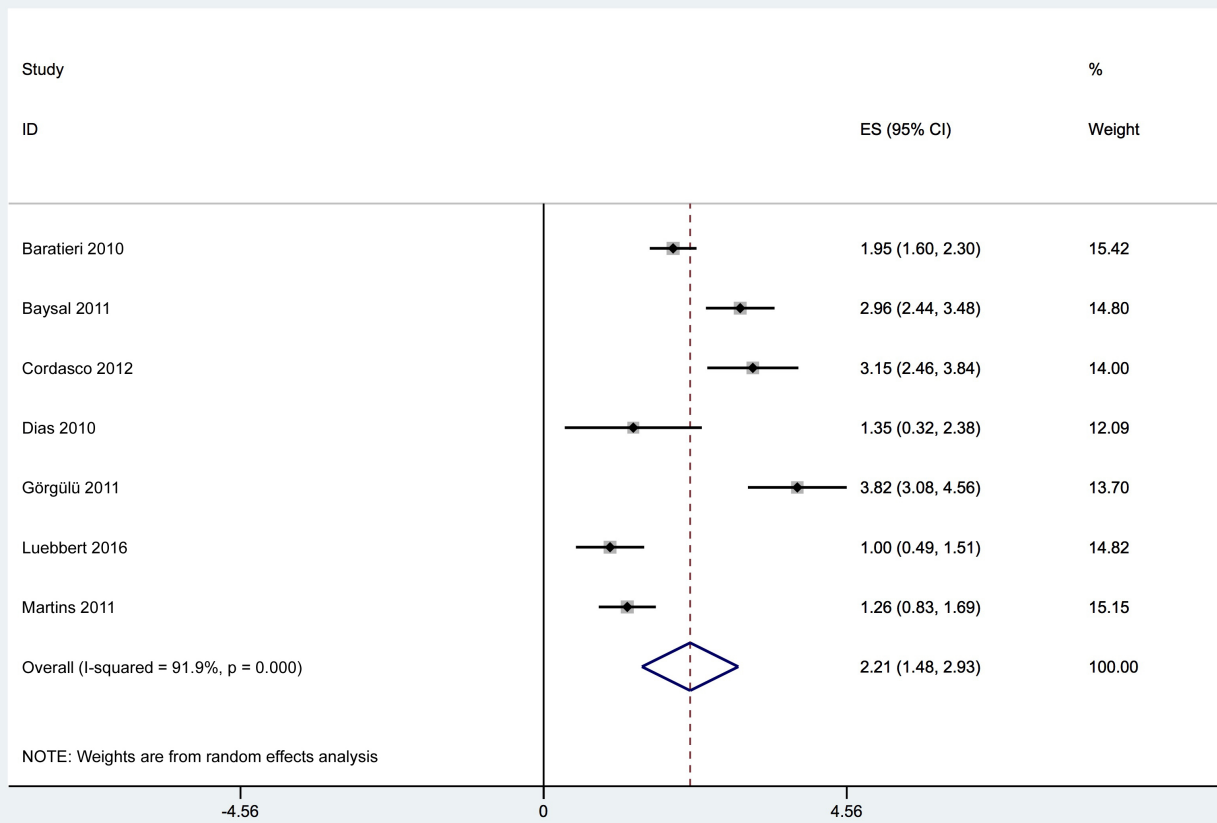

**Supplementary Figure 8.** Forest plot of maxillary basal bone width increments in the interval between T<sub>0</sub> (pre-expansion) and T<sub>2</sub> (post-retention). Reported data are expressed in millimeters (mm).



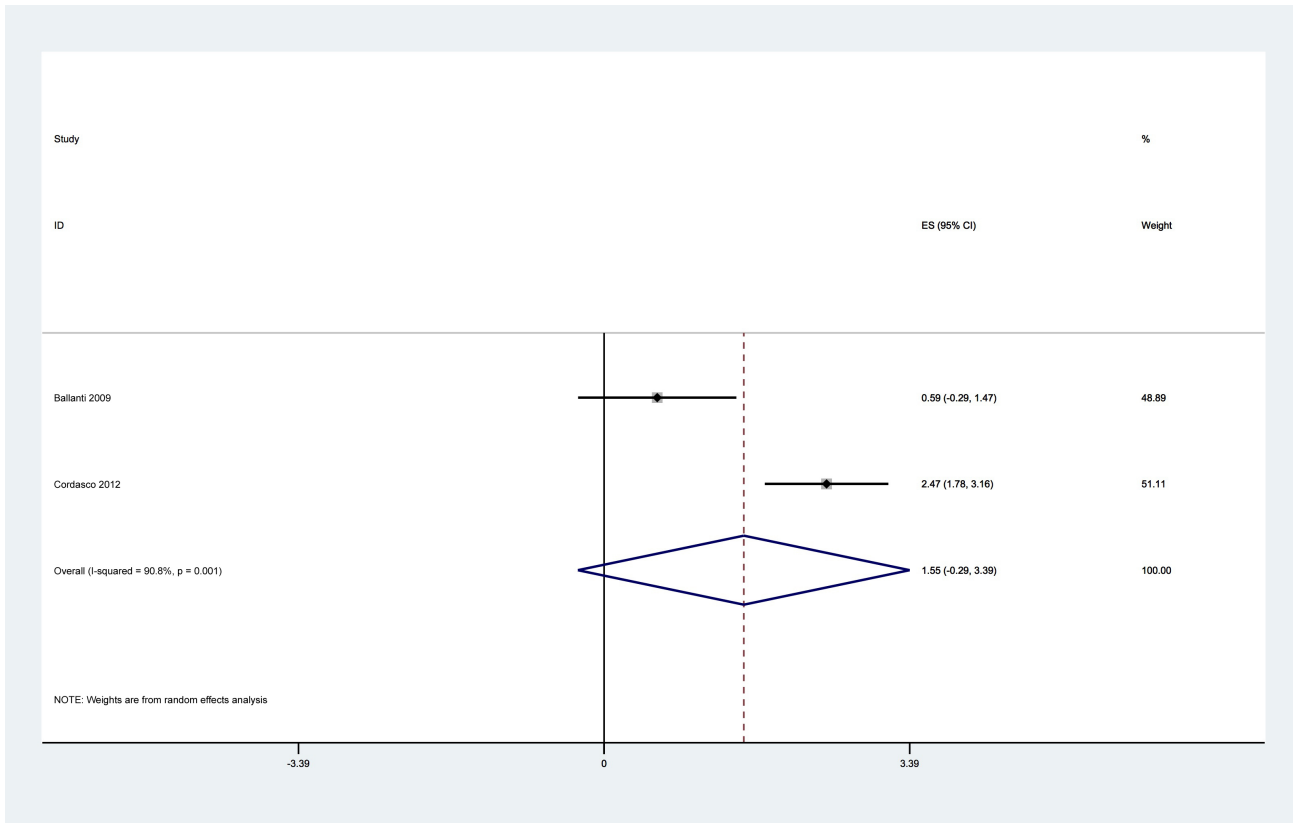

**Supplementary Figure 9.** Forest plot of nasal cavity width increments in the interval between  $T_0$  (pre-expansion) and  $T_2$  (post-retention). Reported data are expressed in millimeters (mm).

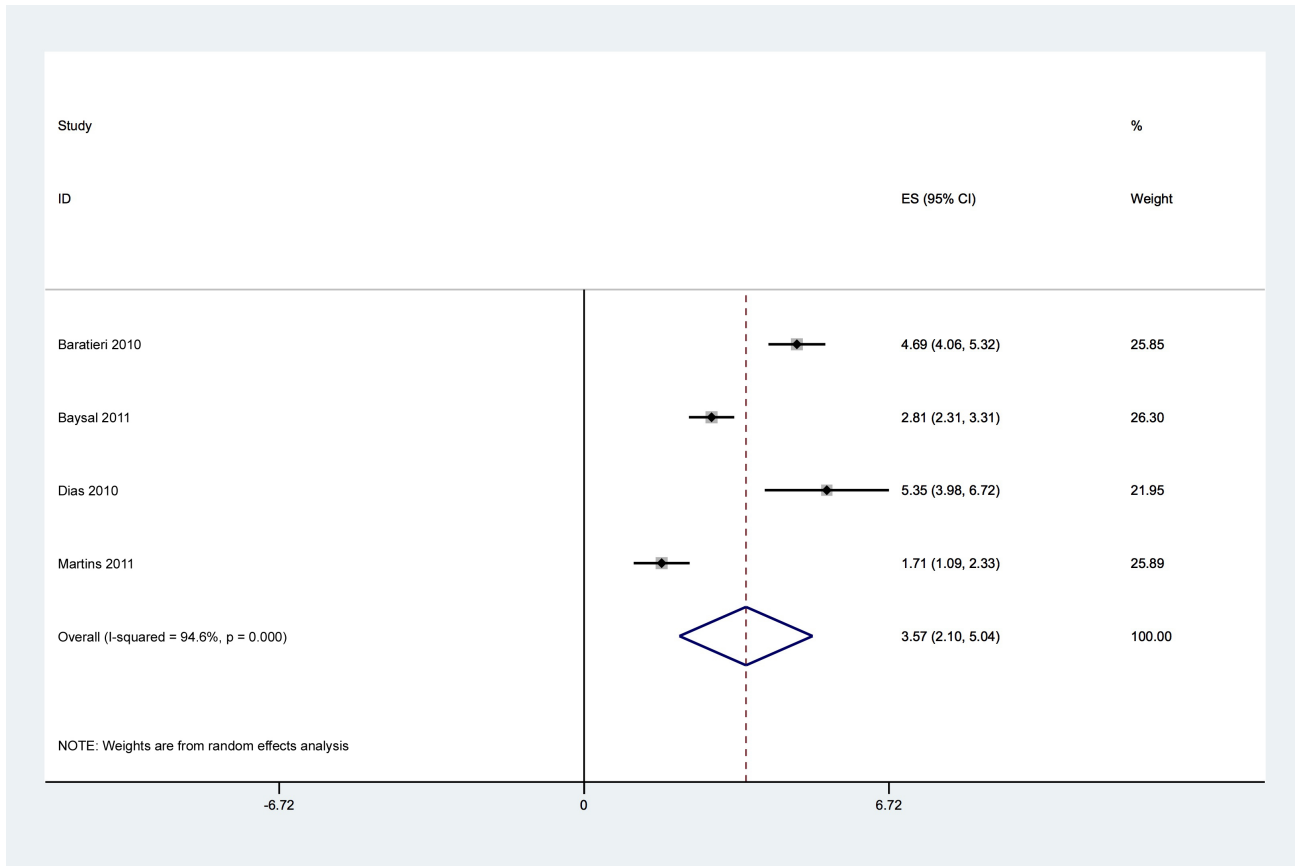

**Supplementary Figure 10.** Forest plot of increments in the quantitative data synthesis outcome alveolar buccal crest width in the interval between T<sub>0</sub> (pre-expansion) and T<sub>2</sub> (post-retention). Reported data are expressed in millimeters (mm).

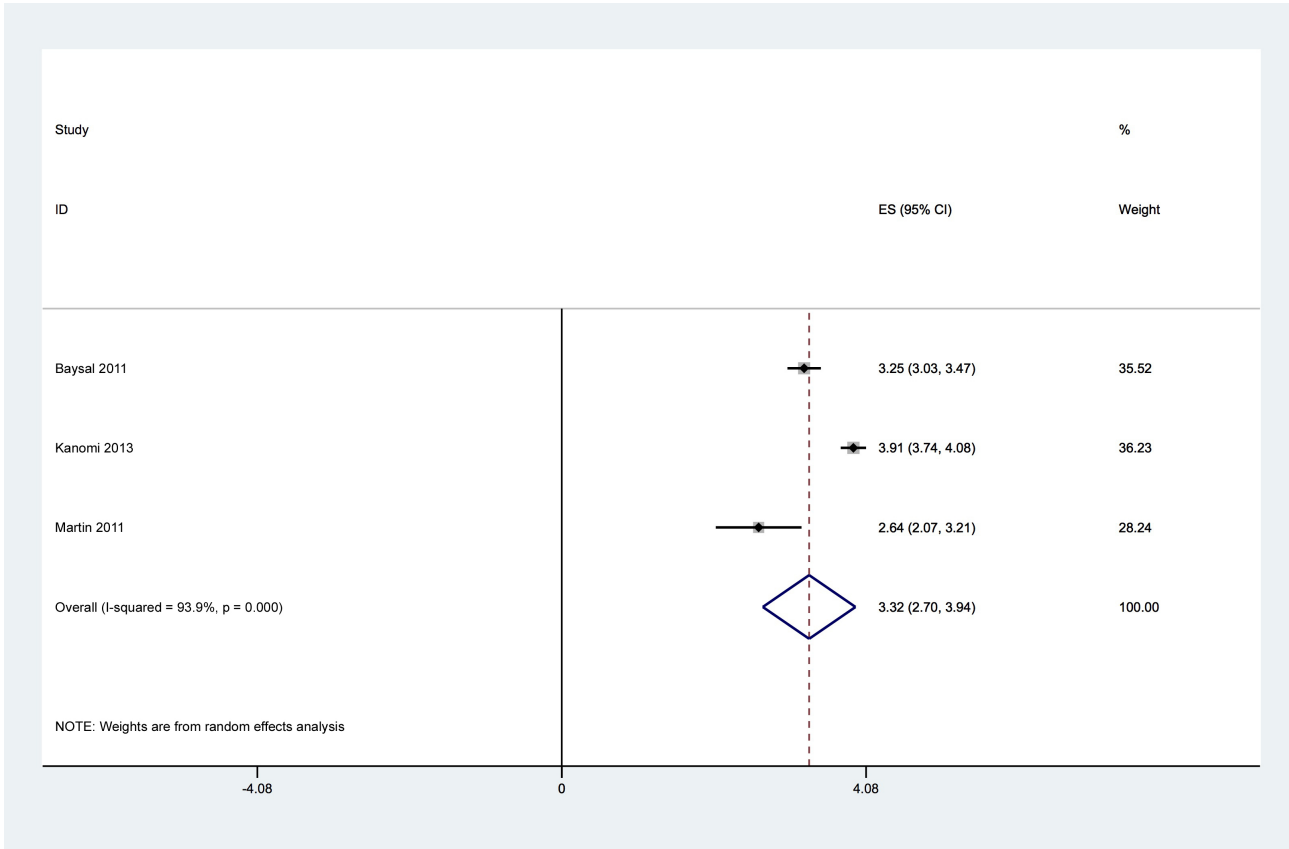

**Supplementary Figure 11.** Forest plot of increments in the quantitative data synthesis outcome alveolar palatal crest width in the interval between T<sub>0</sub> (pre-expansion) and T<sub>2</sub> (post-retention). Reported data are expressed in millimeters (mm).

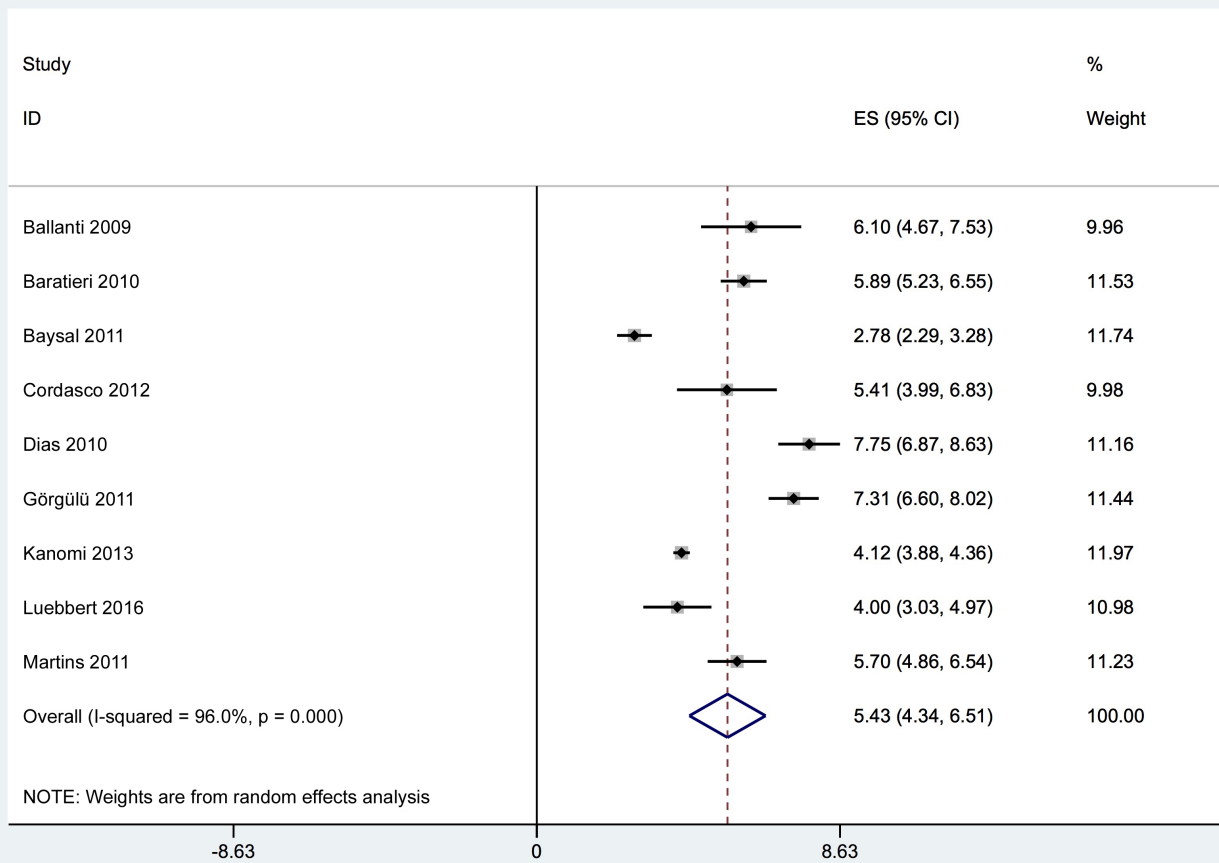

**Supplementary Figure 12.** Forest plot of increments in the quantitative data synthesis outcome inter-molar crown width in the interval between  $T_0$  (pre-expansion) and  $T_2$  (post-retention). Reported data are expressed in millimeters (mm).

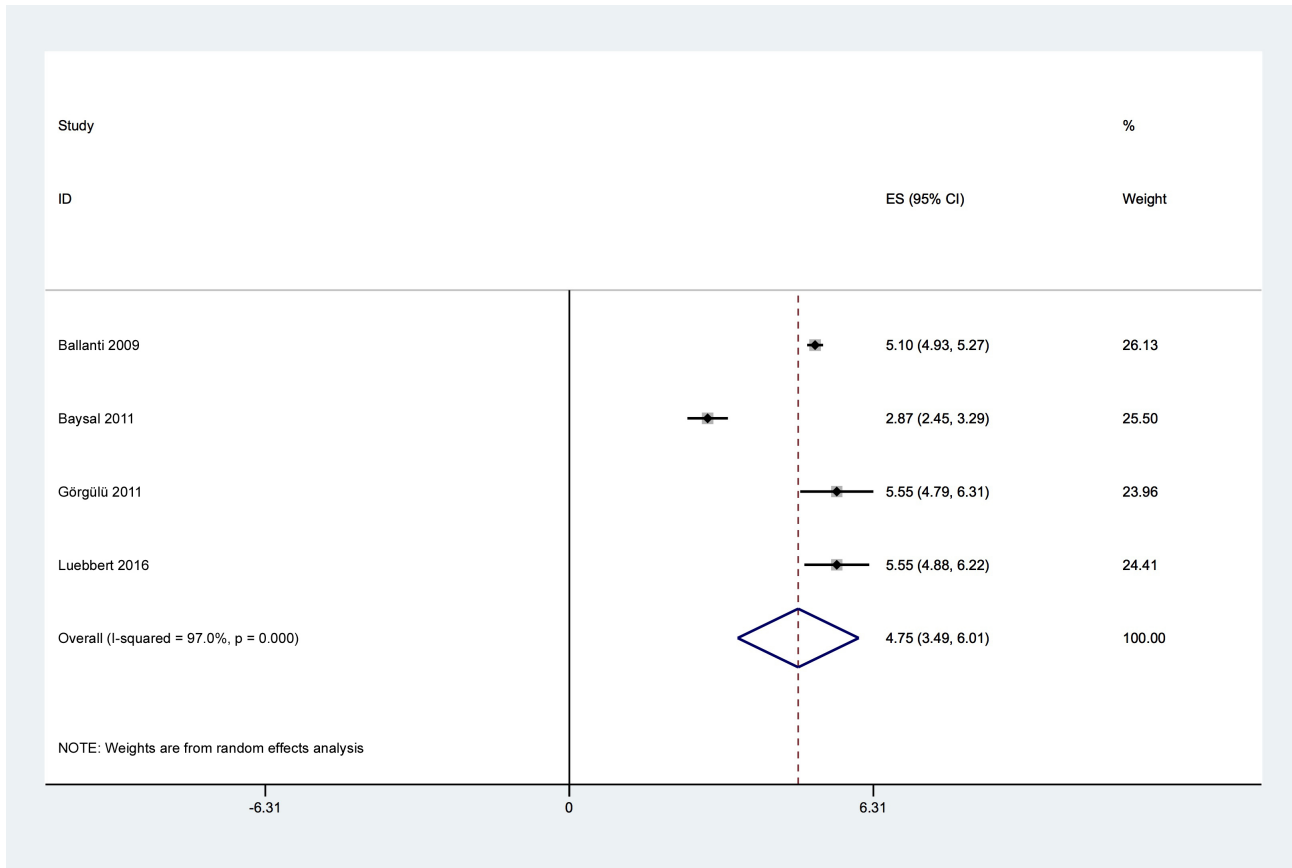

**Supplementary Figure 13.** Forest plot of increments in the quantitative data synthesis outcome inter-molar root apex width in the interval between  $T_0$  (pre-expansion) and  $T_2$  (post-retention). Reported data are expressed in millimeters (mm).

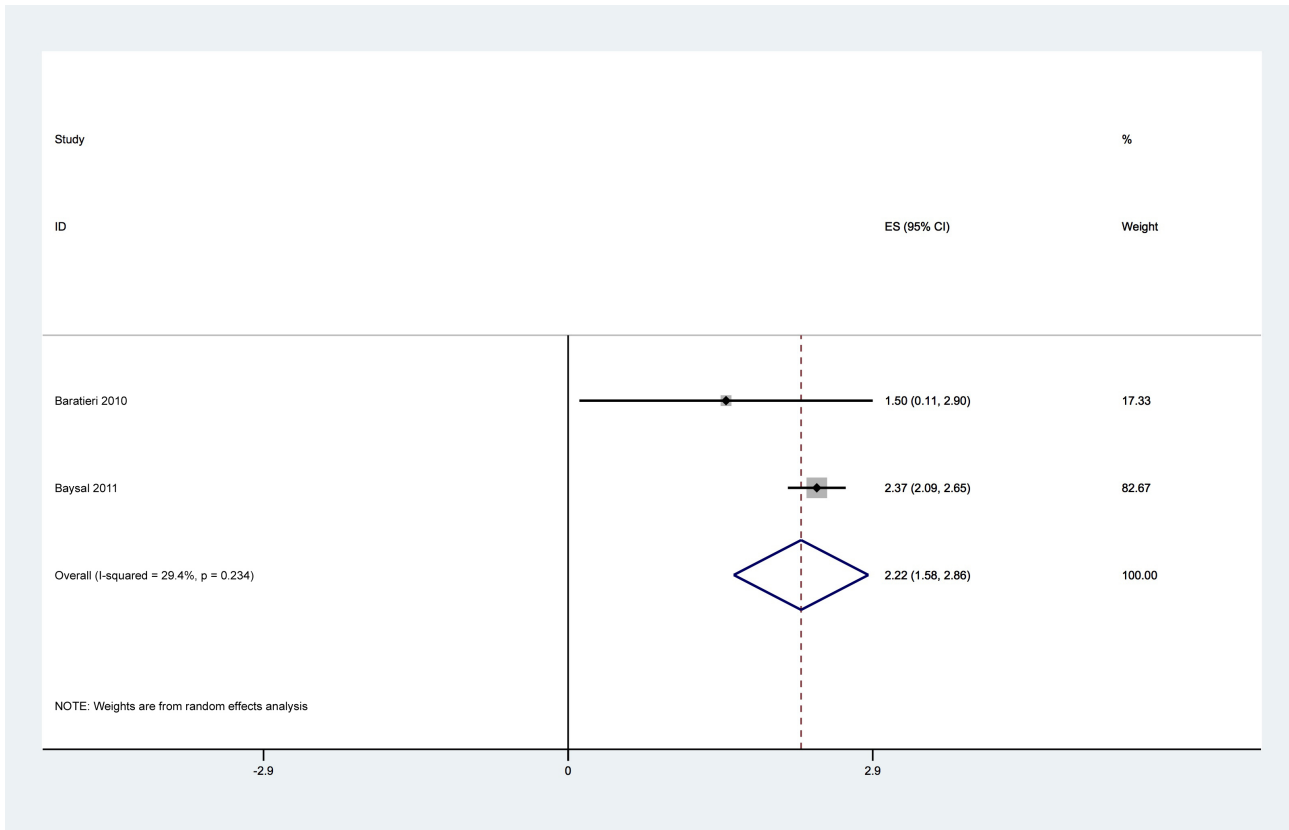

**Supplementary Figure 14.** Forest plot of increments in the quantitative data synthesis outcome dental tipping in the interval between  $T_0$  (pre-expansion) and  $T_2$  (post-retention). Reported data are expressed in angular degree ( $^{\circ}$ ).

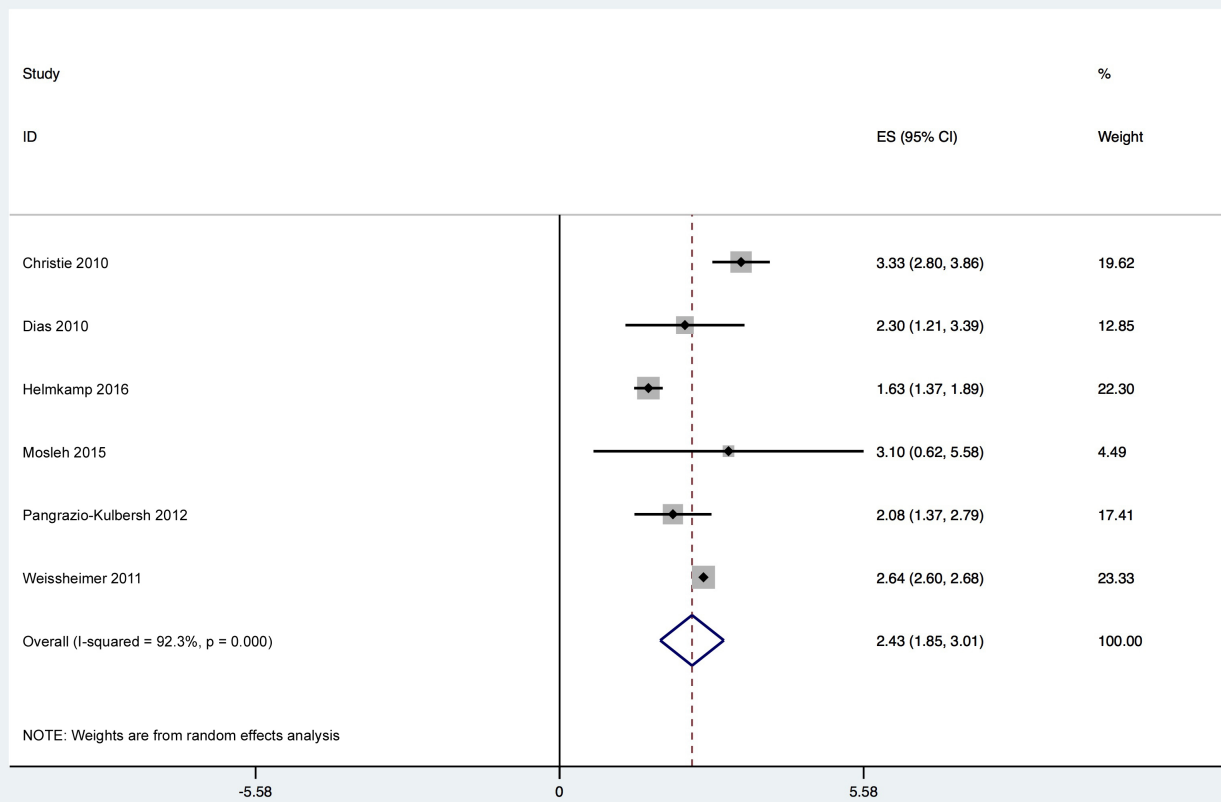

**Supplementary Figure 15.** Sensitivity analysis. The outcome maxillary basal bone width was evaluated after the active expansion phase ( $T_1-T_0$ ), and the trial showing the highest risk of bias (Dogra et al.) was excluded. Reported data are expressed in millimeters (mm).

**Supplementary Table 1.** Search strategies for all the consulted databases

| Searched databases                                                                                                                                             | Search strategies                                                                                                                                                                                                                                                                                                                                                                                                                                                                                      | Hits  |
|----------------------------------------------------------------------------------------------------------------------------------------------------------------|--------------------------------------------------------------------------------------------------------------------------------------------------------------------------------------------------------------------------------------------------------------------------------------------------------------------------------------------------------------------------------------------------------------------------------------------------------------------------------------------------------|-------|
| MEDLINE searched via PubMed searched on July 01, 2019 via <a href="http://www.ncbi.nlm.nih.gov/sites/entrez/">www.ncbi.nlm.nih.gov/sites/entrez/</a>           | ((((((((((cone beam computer tomography) OR cone beam computed tomography) OR cbct) OR low dose computer tomography) OR low dose computed tomography) OR spiral cone beam computed tomography) OR spiral cone beam computed tomography) OR tomography, x-ray computed)) AND (((((((((((palatal expansion) OR maxillary expansion) OR rapid maxillary expansion) OR rme) OR rpe) OR sme) OR spe) OR palatal expansion technique) OR transverse maxillary expansion) OR maxillary transverse deficiency) | 632   |
| OvidSP searched on July 01, 2019 via <a href="https://ovidsp.tx.ovid.com/">https://ovidsp.tx.ovid.com/</a>                                                     | ((palatal expansion OR maxillary expansion OR rapid maxillary expansion OR RME OR RPE OR SME OR SPE OR Palatal expansion technique OR transverse maxillary expansion OR maxillary transverse deficiency)) AND ((cone beam computer tomography OR cone beam computed tomography OR CBCT OR Low dose computer tomography OR Low dose computed tomography OR spiral cone beam computer tomography OR spiral cone beam computed tomography OR tomography, X-Ray computed))                                 | 2,011 |
| ScienceDirect searched on July 01, 2019 via <a href="https://www.sciencedirect.com/search/advanced">https://www.sciencedirect.com/search/advanced</a>          | ((palatal expansion OR maxillary expansion OR rapid maxillary expansion)) AND ((cone beam computer tomography OR cone beam computed tomography OR CBCT OR Low dose computer tomography OR Low dose computed tomography))                                                                                                                                                                                                                                                                               | 90    |
| Cochrane Database searched via The Cochrane Library on July 01, 2019 via <a href="http://www.thecochranelibrary.com">www.thecochranelibrary.com</a>            | ((maxillary expansion) OR (rapid maxillary expansion) OR (palatal expansion technique) OR (maxillary transverse deficiency) OR (transverse maxillary expansion) OR (SME) OR (RME) OR (RPE) OR (SPE)) AND ((cone beam computer tomography) OR (cone beam computed tomography) OR (CBCT) OR (low dose computed tomography) OR (low dose computer tomography) OR (spiral cone beam computer tomography) OR (spiral cone beam computed tomography) OR (tomography, X-Ray computed))                        | 70    |
| Google Scholar searched on July 01, 2019 via <a href="http://www.scholar.google.com">www.scholar.google.com</a>                                                | (palatal expansion OR maxillary expansion OR rapid maxillary expansion OR rme OR rpe OR sme OR spe OR palatal expansion technique OR transverse maxillary expansion OR maxillary transverse deficiency) AND (cone beam computer tomography OR cone beam computed tomography OR CBCT OR Low dose computer tomography OR Low dose computed tomography OR spiral cone beam computer tomography OR spiral cone beam computed tomography)                                                                   | 770   |
| Web of Science searched on July 01, 2019 All Databases: WOS, KJD, MEDLINE, RSCI, SCIELO via <a href="http://www.webofknowledge.com">www.webofknowledge.com</a> | ((((((((((palatal expansion OR maxillary expansion) OR rapid maxillary expansion) OR RME) OR RPE) OR SME) OR SPE) OR Palatal expansion technique) OR transverse maxillary expansion) OR maxillary transverse deficiency) AND (((((((((((cone beam computer tomography OR cone beam computed tomography) OR CBCT) OR Low dose computer tomography) OR Low dose computed tomography) OR spiral cone beam computer tomography) OR spiral cone beam computed tomography) OR tomography, X-Ray computed))   | 718   |



|                                                                                                        |                                                                                                                                                                                                                                                                                                                                                                                                                                                                                                                                                                                                            |     |
|--------------------------------------------------------------------------------------------------------|------------------------------------------------------------------------------------------------------------------------------------------------------------------------------------------------------------------------------------------------------------------------------------------------------------------------------------------------------------------------------------------------------------------------------------------------------------------------------------------------------------------------------------------------------------------------------------------------------------|-----|
| Scopus<br>searched on July 01, 2019 via<br><a href="http://www.scopus.com">www.scopus.com</a>          | (palatal AND expansion OR maxillary AND expansion OR rapid AND maxillary AND expansion OR rme OR rpe OR sme OR spe OR palatal AND expansion AND technique OR transverse AND maxillary AND expansion OR maxillary AND transverse AND deficiency) AND (cone AND beam AND computer AND tomography OR cone AND beam AND computed AND tomography OR cbct OR low AND dose AND computer AND tomography OR low AND dose AND computed AND tomography OR spiral AND cone AND beam AND computer AND tomography OR spiral AND cone AND beam AND computed AND tomography OR tomography )                                | 31  |
| LILACS<br>searched on July 01, 2019 via<br><a href="http://bvsalud.org/en/">http://bvsalud.org/en/</a> | (tw:((tw:(palatal expansion)) OR (tw:(maxillary expansion)) OR (tw:(rapid maxillary expansion)) OR (tw:(RME)) OR (tw:(RPE)) OR (tw:(SME)) OR (tw:(SPE)) OR (tw:(Palatal expansion technique)) OR (tw:(transverse maxillary expansion)) OR (tw:(maxillary transverse deficiency)))) AND (tw:((tw:(cone beam computer tomography)) OR (tw:(cone beam computed tomography)) OR (tw:(CBCT)) OR (tw:(Low dose computer tomography)) OR (tw:(Low dose computed tomography)) OR (tw:(spiral cone beam computer tomography)) OR (tw:(spiral cone beam computed tomography)) OR (tw:(tomography, X-Ray computed)))) | 728 |

|                                                                                                                                       |                                                                                                                                                                                                                                                                                                                                                                                                                                                                    |     |
|---------------------------------------------------------------------------------------------------------------------------------------|--------------------------------------------------------------------------------------------------------------------------------------------------------------------------------------------------------------------------------------------------------------------------------------------------------------------------------------------------------------------------------------------------------------------------------------------------------------------|-----|
| Evidence-Based Medicine<br>searched on July 01, 2019 via<br><a href="https://www.tripdatabase.com/">https://www.tripdatabase.com/</a> | (palatal expansion OR maxillary expansion OR rapid maxillary expansion OR RME OR RPE OR SME OR SPE OR Palatal expansion technique OR transverse maxillary expansion OR maxillary transverse deficiency) AND (cone beam computer tomography OR cone beam computed tomography OR CBCT OR Low dose computer tomography OR Low dose computed tomography OR spiral cone beam computer tomography OR spiral cone beam computed tomography OR tomography, X-Ray computed) | 350 |
|---------------------------------------------------------------------------------------------------------------------------------------|--------------------------------------------------------------------------------------------------------------------------------------------------------------------------------------------------------------------------------------------------------------------------------------------------------------------------------------------------------------------------------------------------------------------------------------------------------------------|-----|

|                                                                                                                                                                                                                                                                 |                                                                                                                                                                                                                                                                                                                                                                                                                                                                                   |   |
|-----------------------------------------------------------------------------------------------------------------------------------------------------------------------------------------------------------------------------------------------------------------|-----------------------------------------------------------------------------------------------------------------------------------------------------------------------------------------------------------------------------------------------------------------------------------------------------------------------------------------------------------------------------------------------------------------------------------------------------------------------------------|---|
| <b>Conference proceedings</b>                                                                                                                                                                                                                                   |                                                                                                                                                                                                                                                                                                                                                                                                                                                                                   |   |
| Conference Proceedings Citation<br>Index searched on July 01, 2019<br>via Web of Science<br>Web of Science Core Collection<br>Conference Proceedings Citation<br>Index- Science (CPCI-S)<br><a href="http://thomsonreuters.com/">http://thomsonreuters.com/</a> | ((((((((((palatal expansion OR maxillary expansion) OR rapid maxillary expansion) OR RME) OR RPE) OR SME) OR SPE) OR Palatal expansion technique) OR transverse maxillary expansion) OR maxillary transverse deficiency) AND (((((((cone beam computer tomography OR cone beam computed tomography) OR CBCT) OR Low dose computer tomography) OR Low dose computed tomography) OR spiral cone beam computer tomography) OR spiral cone beam computed tomography) OR tomography))) | 3 |

|                                                                                                                                                                        |                                                                                                                                                                                                                                       |              |
|------------------------------------------------------------------------------------------------------------------------------------------------------------------------|---------------------------------------------------------------------------------------------------------------------------------------------------------------------------------------------------------------------------------------|--------------|
| <b>Databases of research registers</b>                                                                                                                                 |                                                                                                                                                                                                                                       |              |
| ClinicalTrials.gov<br>searched on July 01, 2019<br>with other terms field<br>via <a href="http://clinicaltrials.gov/ct2/home">http://clinicaltrials.gov/ct2/home</a>   | "maxillary expansion" OR "palatal expansion" OR "maxillary transverse deficiency" OR "palatal expansion technique" AND "cone beam computed tomography" OR "cone beam computer tomography" OR "CBCT" OR "low dose computer tomography" | 430          |
| International Clinical Trials Registry<br>Platform<br>searched on July 01, 2019<br>via <a href="http://apps.who.int/trialsearch/">http://apps.who.int/trialsearch/</a> | "maxillary expansion" OR "palatal expansion" OR "maxillary transverse deficiency" OR "palatal expansion technique" AND "cone beam computed tomography" OR "cone beam computer tomography" OR "CBCT" OR "low dose computer tomography" | 213          |
| <b>Total</b>                                                                                                                                                           |                                                                                                                                                                                                                                       | <b>6,046</b> |



**9. Were additional interventions (co-interventions) clearly described?**

|        |        |        |        |        |        |        |        |        |        |        |        |        |        |
|--------|--------|--------|--------|--------|--------|--------|--------|--------|--------|--------|--------|--------|--------|
| Yes +2 |
|--------|--------|--------|--------|--------|--------|--------|--------|--------|--------|--------|--------|--------|--------|

**Outcome measures**

**10. Were relevant outcome measures established a priori?**

|        |        |        |        |        |        |        |        |        |        |        |        |        |        |
|--------|--------|--------|--------|--------|--------|--------|--------|--------|--------|--------|--------|--------|--------|
| Yes +2 |
|--------|--------|--------|--------|--------|--------|--------|--------|--------|--------|--------|--------|--------|--------|

**11. Were outcome assessors blinded to the intervention that patients received?**

|    |    |    |        |    |    |    |    |    |    |    |    |    |        |
|----|----|----|--------|----|----|----|----|----|----|----|----|----|--------|
| No | No | No | Yes +2 | No | Yes +2 |
|----|----|----|--------|----|----|----|----|----|----|----|----|----|--------|

**12. Were the relevant outcomes measured using appropriate objective/subjective methods?**

|        |        |        |        |        |        |        |        |        |        |        |        |        |        |
|--------|--------|--------|--------|--------|--------|--------|--------|--------|--------|--------|--------|--------|--------|
| Yes +2 |
|--------|--------|--------|--------|--------|--------|--------|--------|--------|--------|--------|--------|--------|--------|

**Statistical analysis**

**13. Were the statistical tests used to assess the relevant outcomes appropriate?**

|        |        |        |        |        |        |        |        |        |        |        |        |        |        |
|--------|--------|--------|--------|--------|--------|--------|--------|--------|--------|--------|--------|--------|--------|
| Yes +2 |
|--------|--------|--------|--------|--------|--------|--------|--------|--------|--------|--------|--------|--------|--------|

**Results and conclusions**

**14. Was follow-up long enough for important events and outcomes to occur?**

|        |        |        |        |        |        |        |        |        |        |        |        |        |        |
|--------|--------|--------|--------|--------|--------|--------|--------|--------|--------|--------|--------|--------|--------|
| Yes +2 |
|--------|--------|--------|--------|--------|--------|--------|--------|--------|--------|--------|--------|--------|--------|

**15. Were losses to follow-up reported?**

|    |    |    |    |    |    |    |    |    |    |    |    |    |    |
|----|----|----|----|----|----|----|----|----|----|----|----|----|----|
| No |
|----|----|----|----|----|----|----|----|----|----|----|----|----|----|

**16. Did the study provided estimates of random variability in the data analysis of relevant outcomes?**

|        |        |    |        |        |    |        |    |        |    |        |    |        |        |
|--------|--------|----|--------|--------|----|--------|----|--------|----|--------|----|--------|--------|
| Yes +2 | Yes +2 | No | Yes +2 | Yes +2 | No | Yes +2 | Yes +2 |
|--------|--------|----|--------|--------|----|--------|----|--------|----|--------|----|--------|--------|

**17. Were the adverse events reported?**

|    |        |    |    |    |    |    |    |    |    |    |    |    |    |
|----|--------|----|----|----|----|----|----|----|----|----|----|----|----|
| No | Yes +2 | No |
|----|--------|----|----|----|----|----|----|----|----|----|----|----|----|

**18. Were the conclusions of the study supported by the results?**

|        |        |        |        |        |        |        |        |        |        |        |        |        |        |
|--------|--------|--------|--------|--------|--------|--------|--------|--------|--------|--------|--------|--------|--------|
| Yes +2 |
|--------|--------|--------|--------|--------|--------|--------|--------|--------|--------|--------|--------|--------|--------|

**19. Competing interests and sources of support**

|    |        |    |        |    |    |    |        |    |    |    |    |    |        |
|----|--------|----|--------|----|----|----|--------|----|----|----|----|----|--------|
| No | Yes +2 | No | Yes +2 | No | No | No | Yes +2 | No | No | No | No | No | Yes +2 |
|----|--------|----|--------|----|----|----|--------|----|----|----|----|----|--------|

**Total Score**

|    |    |    |    |    |    |    |    |    |    |    |    |    |    |    |    |
|----|----|----|----|----|----|----|----|----|----|----|----|----|----|----|----|
| 28 | 32 | 26 | 30 | 30 | 24 | 32 | 28 | 28 | 30 | 28 | 28 | 30 | 22 | 28 | 32 |
|----|----|----|----|----|----|----|----|----|----|----|----|----|----|----|----|

**Supplementary Table 3.** Should orthopedic palatal expansion be used for treating skeletal transverse maxillary deficiency?

| Certainty assessment                |              |                           |                           |              |             |                      | №. of patients                               |         | Effect            |                                                    | Certainty        | Importance |
|-------------------------------------|--------------|---------------------------|---------------------------|--------------|-------------|----------------------|----------------------------------------------|---------|-------------------|----------------------------------------------------|------------------|------------|
| №. of studies                       | Study design | Risk of bias              | Inconsistency             | Indirectness | Imprecision | Other considerations | Orthopaedic palatal expansion [intervention] | Control | Relative (95% CI) | Absolute (95% CI)                                  |                  |            |
| <b>Maxillary basal bone width</b>   |              |                           |                           |              |             |                      |                                              |         |                   |                                                    |                  |            |
| 7                                   | Case series  | Very serious <sup>*</sup> | Very serious <sup>†</sup> | Not serious  | Not serious | None                 | 135                                          |         | -                 | MD <b>2.46 higher</b> (1.9 higher to 3.02 higher)  | ⊕○○○<br>VERY LOW | CRITICAL   |
| <b>Nasal cavity width</b>           |              |                           |                           |              |             |                      |                                              |         |                   |                                                    |                  |            |
| 8                                   | Case series  | Very serious <sup>‡</sup> | Very serious <sup>†</sup> | Not serious  | Not serious | None                 | 160                                          |         | -                 | MD <b>1.95 higher</b> (1.3 higher to 2.59 higher)  | ⊕○○○<br>VERY LOW | CRITICAL   |
| <b>Alveolar buccal crest width</b>  |              |                           |                           |              |             |                      |                                              |         |                   |                                                    |                  |            |
| 9                                   | Case series  | Very serious <sup>‡</sup> | Very serious <sup>†</sup> | Not serious  | Not serious | None                 | 182                                          |         | -                 | MD <b>3.9 higher</b> (2.95 higher to 4.84 higher)  | ⊕○○○<br>VERY LOW | CRITICAL   |
| <b>Alveolar palatal crest width</b> |              |                           |                           |              |             |                      |                                              |         |                   |                                                    |                  |            |
| 4                                   | Case series  | Very serious <sup>*</sup> | Very serious <sup>†</sup> | Not serious  | Not serious | None                 | 63                                           |         | -                 | MD <b>3.09 higher</b> (1.96 higher to 4.21 higher) | ⊕○○○<br>VERY LOW | CRITICAL   |
| <b>Inter-molars crown width</b>     |              |                           |                           |              |             |                      |                                              |         |                   |                                                    |                  |            |
| 9                                   | Case series  | Very serious <sup>‡</sup> | Very serious <sup>†</sup> | Not serious  | Not serious | None                 | 179                                          |         | -                 | MD <b>5.69 higher</b> (4.13 higher to 7.26 higher) | ⊕○○○<br>VERY LOW | CRITICAL   |
| <b>Inter-molars root apex width</b> |              |                           |                           |              |             |                      |                                              |         |                   |                                                    |                  |            |
| 7                                   | Case series  | Very serious <sup>*</sup> | Serious <sup>§</sup>      | Not serious  | Not serious | None                 | 152                                          |         | -                 | MD <b>2.85 higher</b> (2.51 higher to 3.2 higher)  | ⊕○○○<br>VERY LOW | CRITICAL   |
| <b>Dental tipping</b>               |              |                           |                           |              |             |                      |                                              |         |                   |                                                    |                  |            |
| 6                                   | Case series  | Serious <sup>  </sup>     | Very serious <sup>†</sup> | Not serious  | Not serious | None                 | 122                                          |         | -                 | MD <b>3.75 higher</b> (2.18 higher to 5.31 higher) | ⊕○○○<br>VERY LOW | CRITICAL   |

CI, Confidence interval; MD, mean difference.

\*One study did not clearly report the eligibility criteria.

<sup>†</sup>Heterogeneity > 75%.

<sup>‡</sup>Two studies did not clearly report the eligibility criteria.

<sup>§</sup>Heterogeneity < 75%.

<sup>||</sup> Considering the intrinsic bias related to the methodological design of the included studies (case series), they were all rated to at least have a "serious" bias.
